# Supplementary material
Source: PubMed Central journal article supplement (PMC6598380)
Supplement: bloodBLD2019000626-suppl1.pdf [file bloodBLD2019000626-suppl1.pdf]

# Recurrent $MSC^{E116K}$ mutations in ALK-negative anaplastic large cell lymphoma

R.A. Luchtel, et al.

## SUPPLEMENTAL MATERIAL

### Table of Contents

|                                                                                                                                            |    |
|--------------------------------------------------------------------------------------------------------------------------------------------|----|
| Supplemental Methods.....                                                                                                                  | 2  |
| Supplemental Table 1. Clinicopathologic features of frozen exome discovery set .....                                                       | 13 |
| Supplemental Table 2. COSMIC mutations affecting the conserved glutamic acid (E) residue of the ERXR motif of bHLH proteins .....          | 15 |
| Supplemental Table 3. T-NHL samples studied for $MSC^{E116K}$ .....                                                                        | 16 |
| Supplemental Table 4. T-NHL samples studied for muscudin expression by immunohistochemistry .....                                          | 17 |
| Supplemental Table 5. Proteins co-immunoprecipitated with wild-type and/or mutant muscudin .....                                           | 18 |
| Supplemental Table 6. Top GSEA pathways altered in CD3/CD28-stimulated normal CD4 <sup>+</sup> T cells: $MSC^{wt}$ vs. vector only .....   | 20 |
| Supplemental Table 7. Top GSEA pathways altered in CD3/CD28-stimulated normal CD4 <sup>+</sup> T cells: $MSC^{E116K}$ vs. $MSC^{wt}$ ..... | 21 |
| Supplemental Table 8. T-NHL samples studied for MYC expression by immunohistochemistry .....                                               | 22 |
| Supplemental Figure 1. Workflow used for variant calling and prioritization .....                                                          | 23 |
| Supplemental Figure 2. Gene-level analysis of somatic variants in paired exome data .....                                                  | 24 |
| Supplemental Figure 3. Conservation of the ERXR motif in the basic domain of bHLH proteins .....                                           | 26 |
| Supplemental Figure 4. Expression of muscudin protein and the $MSC$ gene in ALCL .....                                                     | 27 |
| Supplemental Figure 5. Protein stability of $MSC^{wt}$ and $MSC^{E116K}$ .....                                                             | 28 |
| Supplemental Figure 6. DNA binding of wild-type and mutant bHLH proteins .....                                                             | 29 |
| Supplemental Figure 7. DNA affinity assay in Karpas 299 cells .....                                                                        | 30 |
| Supplemental Figure 8. ChIP-seq for HA-tagged $MSC^{wt}$ and $MSC^{E116K}$ in ALK-negative ALCL cells ..                                   | 31 |
| Supplemental Figure 9. ChIP-seq motif analysis for HA-tagged $MSC^{wt}$ and $MSC^{E116K}$ in Karpas 299 cells .....                        | 32 |
| Supplemental Figure 10. Gene Set Enrichment Analysis of $MSC^{E116K}$ -transduced T cells .....                                            | 33 |
| Supplemental Figure 11. Binding of E2F2 to $TNFRSF8$ (CD30) DNA in human ALCL cells .....                                                  | 34 |
| Supplemental Figure 12. Proliferative rate in ALCLs with or without $MSC^{E116K}$ .....                                                    | 35 |
| Supplemental Figure 13. Outcome analysis of ALCLs with and without $MSC^{E116K}$ .....                                                     | 36 |
| Supplemental References.....                                                                                                               | 37 |

## **SUPPLEMENTAL METHODS**

### **DNA extraction**

Tissue for sequencing was snap-frozen in OCT directly following surgical removal. Genomic DNA was extracted from frozen sections by phenol-chloroform extraction and ethanol precipitation as previously published.<sup>1</sup> For 22 of the 62 patients, paired normal DNA was extracted from mononuclear cells isolated from peripheral blood samples uninvolved by tumor under protocols conducted by the Molecular Epidemiology Resource of the University of Iowa/Mayo Clinic Lymphoma Specialized Program of Research Excellence.<sup>2</sup>

### **Whole exome sequencing and variant calling**

Tumor and paired normal genomic DNA was captured using SureSelect Human All Exon kit V2 or V4+UTR (Agilent Technologies) and sequenced as 101 bp x 2 paired-end reads at 3 samples/lane on a HiSeq 2000 (Illumina). Additional exome sequencing data reflecting peripheral blood samples from 50 healthy patients without cancer or known family history of genetic disease were obtained from the Mayo Clinic Biobank.<sup>3</sup> FASTQ files from DNA sequencing were aligned to the human genome build GRCh37 using NovoAlign.<sup>4</sup> GATK was used for processing aligned reads, including local realignment and base quality score recalibration according to published Best Practices.<sup>5-7</sup>

An inclusive set of variants for each sample was generated by taking the union of the results of multiple variant callers (GATK, SNVMix,<sup>8</sup> JointSNVMix,<sup>9</sup> SomaticSniper,<sup>10</sup> and MuTect<sup>11</sup>; Supplemental Figure 1). Somatic calling was used for paired samples. GATK UnifiedGenotyper was used to gather all evidence for (backfill) each variant across all samples (tumor, paired normal control, and healthy control). We utilized a variant filtering strategy to

leverage population allele frequencies, within-patient and healthy-patient controls, as well as technical features, to identify the variants with highest biological and technical confidence. Variants that were outside the capture regions, polymorphic ( $\geq 0.1\%$  in ExAC<sup>12</sup>), within repetitive elements as identified using RepeatMasker<sup>13</sup> and UCSC annotation (<https://genome.ucsc.edu/>), or identified in paired germline or healthy control samples were excluded. Recurrent variants were defined as being identified in at least two tumor samples. Variants were quality controlled by manual review of read depths and fractions of supporting reads on a per-sample basis. Copy number alterations were evaluated using PatternCNV as previously published.<sup>14</sup>

### **Sanger sequencing and targeted resequencing**

For Sanger sequencing of *MSC*<sup>E116K</sup>, 10 ng genomic DNA from clinical tissue samples was amplified with KAPA HiFi HotStart ReadyMix (Kapa Biosystems) per the manufacturer's recommendations using the PCR primers 5'-CTCAGCCGCAGAGTGCAA-3' (forward) and 5'-GTGTCCAGCTTGGAGAGCTT-3' (reverse). The reverse primer was used as a sequencing primer. For targeted resequencing, DNA was amplified using the primers 5'-CTCCCGGCCAAGGGCTCA-3' (forward) and 5'-CTTTGCTCAGCACGCGCATC-3' (reverse) that included a 5' oligo tail containing the sequencing primer region of the Illumina NGS adapters. PCR products were purified using Agencourt AMPure (Beckman Coulter) and underwent a 2<sup>nd</sup> PCR reaction using index primers to incorporate a sample-specific barcode sequence with the remaining Illumina adapter sequence. After final AMPure purification, samples were pooled and sequenced on a MiSeq instrument (Illumina). Data were analyzed using a custom bioinformatics pipeline to detect variants with >5% mutant allele frequency.

### **Immunohistochemistry and fluorescence *in situ* hybridization (FISH)**

Immunohistochemistry was performed on FFPE tissue samples using muscudin (N-20, Santa Cruz Biotechnology; 1:50), CD30 (JCM182, Leica; 1:250), MYC (Y69, Epitomics; 1:100), or Ki67 (MIB-1, Dako; 1:300) primary antibodies using previously published methods.<sup>15</sup>

Immunohistochemistry was scored by decile as previously.<sup>16</sup> FISH was performed for *DUSP22* and *TP63* rearrangements as previously published.<sup>17</sup>

### **MSC cloning, mutagenesis, and siRNA**

The *MSC* gene was cloned into pCR2.1-TOPO (Thermo Fisher Scientific) using the primers 5'-CCACCATGTACCCATACGACGTCCAGACTACGCTTCCACGGGCTCGGTGAGT-3' and 5'-ATCCCATCAAGTGAGTTCCAGTCCGA-3' to introduce a 5' HA tag. The E116K mutation was introduced by in situ mutagenesis QuickChange II Site-Directed Mutagenesis Kit (Agilent). Both wild-type and mutant constructs were verified by Sanger sequencing and shuttled into pcDNA3.1 (Thermo Fisher Scientific), pLEX (Open Biosystems), and pLVX-ZsGreen (Clontech) vectors for functional experiments. pLEX-GFP was created by shuttling GFP from pGIPZ (Open Biosystems) into pLEX using SnaBI and NotI restriction enzymes. siRNA targeting *MSC* was purchased from Dharmacon (ON-TARGETplus SMARTpool). siRNA targeting *IRF4* was purchased from Santa Cruz (sc-270125). AllStars negative control siRNA was purchased from Qiagen.

### **Cell lines**

Karpas 299 and HEK-293T cell lines were obtained from ATCC. Mac-1 and Mac-2A cells were derived by M.E.K. from a patient with multiple T-cell neoplasms.<sup>18</sup> FE-PD was provided by Dr. K. Pulford, Oxford, United Kingdom, with permission from Dr. A. Del Mistro, Padova, Italy. ALCL cells were maintained in RPMI and HEK-293T cells in DMEM, all with 10% FBS (Clontech) and 1% penicillin/streptomycin (Gibco). CD4<sup>+</sup> T cells were isolated from normal donor peripheral blood using a human CD4<sup>+</sup> T-cell enrichment kit (STEMCELL Technologies) and cultured in X-VIVO 15 medium (Lonza). Normal T cells were stimulated with anti-CD3/CD28 beads (Fisher Scientific).

### **Transfection and lentiviral transduction**

T-cell lymphoma cell lines were transiently transfected with siRNA or pcDNA vectors by electroporation as previously described<sup>19,20</sup> or using the Amaxa Nucleofector Kit V (Amaxa) according to the manufacturer's instructions. Lentiviral particles were generated in HEK-293T cells and concentrated using Lenti-X Concentrator (Clontech). Karpas 299, FE-PD, and Mac-1 cells were transduced with pLEX lentivirus and puromycin was added to the medium 48 h after transduction to selectively culture transduced cells. Normal T cells were transduced with pLVX-ZsGreen lentivirus and sorted for GFP expression 72 h post-transduction. GFP-positive cells were cultured in the presence of anti-CD3/CD28 beads (Fisher Scientific) and assayed at 3 days (RNA) or 8 days (protein) post-transduction.

To evaluate normal T-cells expressing both  $MSC^{wt}$  and  $MSC^{E116K}$ , we inserted  $MSC^{E116K}$  into pLVX-mCherry (Clontech). We then co-transduced CD4<sup>+</sup> T-cells with pLVX-ZsGreen- $MSC^{wt}$  and pLVX-mCherry- $MSC^{E116K}$  or their corresponding empty vectors and flow-sorted the

resultant cells for ZsGreen and mCherry double-positivity. Sorted cells were activated with anti-CD3/CD28 beads as above for further experiments.

### **Western blotting and protein stability assay**

Western blotting was performed as previously described.<sup>19,20</sup> Nuclear and cytoplasmic fractions were extracted using the NE-PER Nuclear and Cytoplasmic Extraction Kit (Thermo Scientific) following the manufacturer's instructions. Membranes were incubated with the following primary antibodies: MSC (N-20; Santa Cruz), HA (12CA5; Roche),  $\beta$ -Actin (AC-15; Novus), E2A (V-18; Santa Cruz), HEB (H-4; Santa Cruz), E2F2 (2302C4a; Abcam), MYC (Cell Signaling), GAPDH (14C10; Cell Signaling),  $\alpha$ -tubulin (2144S, Cell Signaling), Lamin A (133A2, Cell Signaling), CD30 (EPR4102; Abcam), or IRF4 (M-17; Santa Cruz). Protein detection was performed on a LI-COR Odyssey CL<sub>X</sub> using IRDye 680W and 800CW secondary antibodies (LI-COR).

To assess the stability of wild-type and mutant musculin protein, we treated Karpas 299 cells transduced with *MSC*<sup>wt</sup> or *MSC*<sup>E116K</sup> with cycloheximide (100  $\mu$ g/mL; Thermo Fisher) and the caspase inhibitor Q-VD-OPh (5  $\mu$ M; SM Biochemicals) and assessed proteins by Western blot as above at time intervals from 0 h to 6 h. Densitometry was performed and background-corrected on the LI-COR and values were normalized to  $\beta$ -actin.

### **Cell growth, cell cycle, and flow cytometry**

For the competitive growth assay, Karpas 299 stably expressing GFP were mixed 1:1 with Karpas 299 cells stably transduced with empty pLEX vector, pLEX-HA-*MSC*<sup>wt</sup>, or pLEX-HA-*MSC*<sup>E116K</sup>. Cell mixtures were cultured for two weeks in the presence of puromycin, with or

without JQ1 at the indicated concentrations or DMSO. The percentage of GFP-positive cells was measured by flow cytometry at the start of the experiment and twice per week thereafter and normalized to control vector.

CD4<sup>+</sup> T cells transduced with pLVX-EF1 $\alpha$ -IRES-ZsGreen1 empty vector or vectors containing *MSC*<sup>wt</sup> or *MSC*<sup>E116K</sup> were flow-sorted for GFP expression and re-activated with anti-CD3/CD28. MTS assays and cell cycle analyses were performed 3 days after re-activation. MTS assay (CellTiter 96® Aqueous Non-Radioactive Cell Proliferation Assay, Promega) was performed as previously described.<sup>21</sup> Briefly, 3,000 cells were plated per well with or without drug, the MTS reagent was added, and colorimetric determination was performed at the indicated timepoints. For cell cycle analysis, cells were stained using the Click-iT™ EdU Alexa Fluor™ 647 Flow Cytometry Assay Kit (ThermoFisher, C10419) according to the manual with FxCycle Violet Stain (ThermoFisher, F10347) as the DNA stain. The cells were then analyzed on a BD FACSCanto™ II flow cytometer (BD Biosciences) and the data were analyzed using FlowJo v10 (Tree Star). GFP-positive cells were gated for cell cycle analysis.

For Karpas 299 cells, cell cycle analysis was performed 24 hours after co-transfection with GFP and vectors of interest. GFP-positive cells were gated for cell cycle analysis. Karpas 299 cells were stained 3 days after transfection for CD30 (BD Pharmingen 341635), c-MYC (R&D Systems, IC2585P), or HA (R&D Systems, IC6875R) using the BD Phosflow™ Protocol with Lyse/Fix Buffer (BD 558049) and Phosflow Perm Buffer III (BD 558050). Cells were analyzed on a BD FACSCanto™ II flow cytometer and data were analyzed with FlowJo v10. E2F2 expression was evaluated based on HA positivity.

### **RNA sequencing and gene expression profiling**

Total RNA was extracted from transduced normal T cells and Karpas 299 cells using Qiagen RNAEasy. RNA sequencing libraries were prepared using TruSeq mRNA v2 (Illumina) and paired-end sequenced on an Illumina HiSeq as previously published.<sup>21</sup> RNAseq data were analyzed using the MAP-RSeq pipeline.<sup>22</sup> Paired-end reads were aligned to the hg19 reference genome using TopHat v2.1.0<sup>23</sup> and gene counts were estimated using HTSeq v0.5.3<sup>24</sup> based on RefGene annotation. Gene counts were normalized to reads per kilobase per million mapped reads (RPKM). Genes differentially expressed between  $MSC^{wt}$  and  $MSC^{E116K}$  were identified using the edgeR package<sup>25</sup> with biological coefficient of variation (bcv) = 0.2,  $P$  value = 0.05, and fold change = 3; raw gene counts were normalized using the trimmed mean of M-values (TMM) option. For pathway analysis, a minimum read count threshold of 100 was applied, and fold-change was used to rank genes for Gene Set Enrichment Analysis (GSEA).<sup>26,27</sup> Affymetrix gene expression data from 31 ALCLs have been previously published and are publically available (GEO accession, GSE118238).<sup>16,28</sup> Analysis of differences in gene expression between mutated and unmutated ALCLs was carried out using multiple comparison (Bonferroni) correction.

### **Chromatin immunoprecipitation sequencing (ChIP-seq)**

ChIP-seq for HA-tagged musculin was performed on cells expressing empty vector, HA- $MSC^{wt}$ , or HA- $MSC^{E116K}$ . ChIP-seq for IRF4 was performed on normal CD4<sup>+</sup> T cells activated with anti-CD3/CD28 beads and ALCL cell lines. Cells were cross-linked to 1% formaldehyde for 10 min and quenched in 125 mM glycine for 5 min. ChIP-seq was performed as previously described<sup>29</sup> with the following alterations: chromatin was digested with 1,000 gel units of MNase (NEB, Cat. #M0247S) per  $4 \times 10^6$  cells and subjected to 10 minutes of sonication (30 sec on / 30 sec off) in a



Bioruptor Twin (UCD-400; Diagenode). Immunoprecipitation was performed using anti-IRF4 (Santa Cruz; M-17) or anti-HA affinity matrix (Roche Diagnostics; Cat. #11815016001). ChIP-seq libraries were prepared from up to 10 ng ChIP and input DNA using the ThruPLEX® DNA-seq Kit V2 (Rubicon Genomics). Libraries were sequenced to 51 base pairs from both ends on an Illumina HiSeq 2000 instrument in the Mayo Clinic Center for Individualized Medicine Medical Genomics Facility.

ChIP-seq data were processed using the HiChIP pipeline.<sup>30</sup> Briefly, reads were aligned to the hg19 reference genome using the Burrows-Wheeler Alignment (BWA) tool v0.6.2<sup>31</sup> and only pairs with one or both ends being uniquely mapped were retained. Duplicates were removed using the Picard MarkDuplicates tool (<http://broadinstitute.github.io/picard/>). Peaks were identified using Model-based analysis of ChIP-Seq (MACS) v2.0.10 at a false discovery rate (FDR) of 1% and at least twofold enrichment over input.<sup>32</sup> Peaks were assigned to genes based on RefGenes if the transcriptional start site (TSS) was within 10 kb using the intersectBed command from BEDtools.<sup>33</sup> To identify sites showing differential musculin or IRF4 binding, peaks were merged if they showed overlap by at least 1 bp. For each merged peak, raw read counts were estimated from the unique alignments (after duplicate removal) using the intersectBed command and normalized to 10 million uniquely mapped reads. Fold-change was calculated using the normalized read counts and a fold-change cutoff of  $\geq 2$  was used to infer differential binding sites. To plot the musculin or IRF4 signals over RefGene TSS, we estimated the read density (RPM, reads per million) in each of the 100-bp non-overlapping bins over the TSS  $\pm$  5kb region using the ngs.plot tool v2.02.<sup>34</sup> To identify DNA binding motifs within musculin peaks, the 100-bp sequence centered on the peak center was extracted. Motifs were identified using MEME Suite v4.11.1<sup>35</sup>, at the parameter settings of "-dna -mod zoops -nmotifs

10 -minw 7 -maxw 20 -revcomp". We used the FIMO tool<sup>36</sup> in MEME Suite to scan the peak center  $\pm$  50bp sequences for matches ( $P \leq 1e-04$ ) against the CAGCTG motif position weight matrix extracted from the MEME output.

ChIP was performed as above to determine binding of E2F2 to the human *TNFRSF8* (CD30) gene using an HA antibody on HA-E2F2 transfected Karpas 299 cells. Binding was assessed by quantitative PCR and analyzed with the  $\Delta\Delta$ Ct method using 1% of the input DNA as a normalization control. Two sets of primers were used targeting sequences 77 bp upstream (forward, 5'-GCGTCTCCTAGTGTGCCTTT-3'; reverse, 5'-ACACTTAGCTACAAGCAGCG-3') and 989 bp downstream (forward, 5'-ACTGAGCACTTACCAGTGGC-3'; reverse, 5'-AACACGCCTGGTTACTTTGC-3') of the *TNFRSF8* transcription start site.

### **Co-immunoprecipitation and tandem mass spectrometry (MS/MS)**

Co-immunoprecipitation of HA-tagged musculin was performed on Karpas 299 cells transfected with pcDNA3.1, pcDNA3.1-HA-*MSC*<sup>wt</sup>, or pcDNA3.1-HA-*MSC*<sup>E116K</sup> using the Pierce HA-Tag Magnetic IP Kit (ThermoFisher Scientific). Cells were lysed and proteins were co-immunoprecipitated following the manufacturer's instructions. Proteins were eluted by boiling in sample buffer. Eluates were then purified by electrophoresis and the gel was fixed and stained with BioSafe Coomassie stain (BioRad). The middle cross-section of each lane was excised as a single segment and digested with trypsin. Peptides were extracted and analyzed by nano-flow liquid chromatography electrospray tandem mass spectrometry (nanoLC-ESI-MS/MS) using a Thermo Scientific Q-Exactive Plus Mass Spectrometer (Thermo Fisher Scientific) coupled to a Thermo Ultimate 3000 RSLCnano HPLC system. Tandem mass spectra (MS/MS) were extracted using msConvert version 3.0.9134 (ProteoWizard<sup>37</sup>) and analyzed using MyriMatch<sup>38</sup>

database search engine (version 2.1.138). MyriMatch was configured to match the MS/MS against SwissProt human protein sequence database (downloaded 6/2013) supplemented with common sample handling contaminant proteins. Reversed protein sequences were appended to the database for estimating false discovery rates (FDRs). IDPicker<sup>39</sup> software (version 3.0.504) filtered the peptide identifications at 0.5% FDR and proteins with at least two unique peptides were considered for further analysis. The total number of MS/MS matching a protein were considered as a semi-quantitative measure of its abundance.<sup>40</sup> Protein spectral counts were normalized and ratios were computed for each pair of samples (i.e. wild-type vs. control or mutant vs. control or mutant vs. wild-type). Computed ratios were standardized and converted to *P* values. Proteins that had no spectral counts in the control sample and had *P* values  $\leq 0.01$  and absolute ratios  $\geq 2.0$  in at least one pair described above were considered robust candidates and reported.

### **Electrophoretic mobility shift assay (EMSA) and DNA affinity assay**

For EMSA, MSC<sup>wt</sup>, MSC<sup>E116K</sup>, TCF3<sup>wt</sup> (E47), TCF3<sup>E555K</sup> (E47), and HEB proteins were synthesized in vitro from pcDNA3-MSC<sup>wt</sup>, pcDNA3-MSC<sup>E116K</sup>, pcDNA3-E47 (Addgene plasmid #16059 from Robert Benezra<sup>41</sup>), pcDNA3-E47<sup>E555K</sup> (generated using QuikChange II Site-Directed Mutagenesis Kit, Agilent), and pCellFree-TCF12 (Addgene plasmid #67113 from Kirill Alexandrov<sup>42</sup>) using the TnT Quick Coupled Transcription/Translation System (Promega). EMSA was performed using the Odyssey EMSA Buffer Kit (LI-COR). IRDye 700-labeled oligonucleotides were designed for previously described musculin and E2A binding motifs as follows: 5'-CGGCCGACCAGCTGGAGATCCT-3' and 5'-CGGCCGACCAGGTGGAGATCCT-3' (Integrated DNA Technologies).<sup>43,44</sup> Probes were

incubated with protein combinations indicated using the Odyssey Infrared EMSA Kit (LI-COR). Resulting complexes were analyzed by electrophoresis on a 5% acrylamide gel and imaged using the Odyssey CL<sub>X</sub> Imaging System (LI-COR).

For the DNA affinity assay, biotin-labeled oligonucleotides with the identical nucleotide sequences as above (Integrated DNA Technologies) were bound to streptavidin-conjugated magnetic beads (Dynabeads M-280 Streptavidin; Invitrogen) and incubated with nuclear lysates derived from cells transduced with pLEX, pLEX-*MSC*<sup>wt</sup> or pLEX-*MSC*<sup>E116K</sup> for 2 hours. The magnetic beads were then isolated and washed and bound proteins were eluted for detection by Western blotting.

### **E2F luciferase reporter assay**

The Cignal Reporter E2F luciferase assay (Qiagen) was used to assess E2F activity. Karpas 299 cells transduced with pLEX, pLEX-*MSC*<sup>wt</sup> or pLEX-*MSC*<sup>E116K</sup> were transfected with Cignal E2F Reporter and luciferase activity was measured at 24h post-transfection using the Dual-Luciferase Reporter Assay System (Promega).

### **Statistical analysis**

Statistical analyses were performed either using JMP Pro 10 (SAS Institute) or in the SPSS or R statistical environment. Statistical tests were used as noted. *P*-values ≤0.05 were considered statistically significant except where indicated.

### **Data sharing statement**

For original data, please contact [feldman.andrew@mayo.edu](mailto:feldman.andrew@mayo.edu).

## SUPPLEMENTAL TABLES

Supplemental Table 1. Clinicopathologic features of frozen tissue exome discovery set

| Case | Age/Sex | WHO Subtype             | Paired Normal |
|------|---------|-------------------------|---------------|
| T17  | 46/M    | ALCL, ALK negative      | No            |
| T19  | 39/M    | ALCL, ALK negative      | No            |
| T20  | 18/F    | ALCL, ALK positive      | No            |
| T22  | 73/M    | ALCL, ALK positive      | No            |
| T23  | 39/F    | ALCL, ALK negative      | No            |
| T27  | 64/M    | ALCL, primary cutaneous | Yes           |
| T29  | 59/F    | ALCL, primary cutaneous | Yes           |
| T30  | 74/M    | ALCL, ALK negative      | No            |
| T31  | 51/M    | ALCL, ALK negative      | No            |
| T32  | 42/M    | ALCL, ALK negative      | No            |
| T33  | 68/F    | ALCL, primary cutaneous | No            |
| T34  | 49/F    | ALCL, ALK negative      | No            |
| T35  | 58/M    | ALCL, ALK negative      | No            |
| T36  | 80/M    | ALCL, ALK negative      | No            |
| T37  | 17/M    | ALCL, ALK positive      | No            |
| T39  | 12/F    | ALCL, primary cutaneous | No            |
| T40  | 54/F    | ALCL, ALK negative      | No            |
| T41  | 49/M    | ALCL, ALK positive      | No            |
| T43  | 61/M    | ALCL, primary cutaneous | No            |
| T44  | 6/F     | ALCL, ALK positive      | No            |
| T45  | 65/F    | ALCL, ALK negative      | No            |
| T47  | 69/M    | PTCL, NOS               | Yes           |
| T49  | 67/M    | PTCL, NOS               | Yes           |
| T51  | 37/M    | ALCL, ALK positive      | Yes           |
| T53  | 59/M    | ALCL, ALK negative      | Yes           |
| T55  | 72/M    | PTCL, NOS               | Yes           |
| T58  | 71/M    | PTCL, NOS               | Yes           |
| T60  | 22/M    | ALCL, ALK positive      | No            |
| T62  | 13/M    | ALCL, ALK positive      | Yes           |
| T64  | 28/F    | ALCL, ALK positive      | No            |
| T65  | 53/F    | ENKTL                   | No            |
| T66  | 47/M    | ENKTL                   | No            |
| T67  | 49/F    | PTCL, NOS               | No            |
| T68  | 65/M    | ENKTL                   | No            |

|      |      |                         |     |
|------|------|-------------------------|-----|
| T70  | 64/F | AITL                    | Yes |
| T71  | 16/M | ALCL, ALK positive      | No  |
| T73  | 75/M | AITL                    | Yes |
| T75  | 58/F | AITL                    | Yes |
| T76  | 83/F | ALCL, ALK negative      | No  |
| T81  | 42/F | AITL                    | Yes |
| T85  | 42/M | AITL                    | Yes |
| T87  | 67/F | AITL                    | Yes |
| T90  | 76/M | ALCL, ALK negative      | Yes |
| T91  | 74/M | ALCL, primary cutaneous | No  |
| T95  | 61/F | ENKTL                   | No  |
| T99  | 60/M | PTCL, NOS               | No  |
| T100 | 59/M | PTCL, NOS               | No  |
| T106 | 48/M | PTCL, NOS               | No  |
| T109 | 66/M | PTCL, NOS               | No  |
| T112 | 50/M | EATL                    | Yes |
| T114 | 60/F | MF                      | Yes |
| T117 | 55/M | PTCL, NOS               | No  |
| T118 | 64/F | PTCL, NOS               | No  |
| T120 | 78/M | MF                      | Yes |
| T122 | 62/M | PTCL, NOS               | No  |
| T123 | 77/F | ALCL, ALK negative      | No  |
| T124 | 74/M | PTCL, NOS               | No  |
| T125 | 48/F | ALCL, ALK positive      | No  |
| T127 | 48/M | ALCL, ALK negative      | Yes |
| T129 | 50/M | ALCL, ALK negative      | Yes |
| T133 | 67/F | ALCL, ALK negative      | Yes |
| T190 | 44/M | ALCL, ALK positive      | No  |

AITL, angioimmunoblastic T-cell lymphoma; ALCL, anaplastic large cell lymphoma; ALK, anaplastic lymphoma kinase; EATL, enteropathy-associated T-cell lymphoma; ENKTL, extranodal NK/T-cell lymphoma, nasal type; F, female; M, male; MF, mycosis fungoides; PTCL, NOS, peripheral T-cell lymphoma, not otherwise specified; WHO, World Health Classification.

**Supplemental Table 2. COSMIC\* mutations affecting the conserved glutamic acid (E) residue of the ERXR motif of bHLH proteins**

| Gene           | Site | Amino acid alteration | Primary site                 | Primary histology     | Mutation ID | Mutation CDS | Additional reference |
|----------------|------|-----------------------|------------------------------|-----------------------|-------------|--------------|----------------------|
| <i>ARNT</i>    | 98   | p.E98Q                | Kidney                       | Carcinoma             | COSM1660634 | c.292G>C     | 45                   |
| <i>ARNT2</i>   | 72   | p.E72K                | Stomach; large intestine     | Carcinoma             | COSM4057237 | c.214G>A     | 46                   |
| <i>ATOH7</i>   | 49   | p.E49K                | Urinary tract                | Carcinoma             | COSM3790891 | c.145G>A     |                      |
| <i>FERD3L</i>  | 110  | p.E110K               | Skin                         | Carcinoma             | COSM4542968 | c.328G>A     | 47                   |
| <i>FERD3L</i>  | 110  | p.E110Q               | Esophagus                    | Carcinoma             | COSM5430632 | c.328G>C     |                      |
| <i>MAX</i>     | 32   | p.E32*                | Lung                         | Carcinoma             | COSM371744  | c.94G>T      | 48                   |
| <i>MITF</i>    | 213  | p.E213Q               | Urinary tract                | Carcinoma             | COSM3775349 | c.637G>C     |                      |
| <i>MYF6</i>    | 102  | p.E102K               | Skin                         | Melanoma              | COSM3465839 | c.304G>A     |                      |
| <i>MYOD1</i>   | 118  | p.E118Q               | Urinary tract                | Carcinoma             | COSM1297893 | c.352G>C     |                      |
| <i>MYOD1</i>   | 118  | p.E118*               | Lung                         | Carcinoma             | COSM394903  | c.352G>T     | 48                   |
| <i>NEUROD1</i> | 110  | p.E110G               | Lung                         | Carcinoma             | COSM402132  | c.329A>G     | 48                   |
| <i>NEUROD1</i> | 110  | p.E110K               | Skin                         | Melanoma              | COSM4400389 | c.328G>A     |                      |
| <i>NEUROD4</i> | 96   | p.E96K                | Lung                         | Carcinoma             | COSM5246904 | c.286G>A     |                      |
| <i>NEUROD6</i> | 103  | p.E103K               | Large intestine; ovary; skin | Carcinoma; melanoma   | COSM1329868 | c.307G>A     | 49                   |
| <i>NEUROG3</i> | 92   | p.E92K                | Skin                         | Melanoma              | COSM3440003 | c.274G>A     |                      |
| <i>OLIG3</i>   | 92   | p.E92K                | Endometrium                  | Carcinoma             | COSM1073792 | c.274G>A     |                      |
| <i>SOHLH1</i>  | 62   | p.E62K                | Esophagus                    | Carcinoma             | COSM1173467 | c.184G>A     | 50                   |
| <i>TCF12</i>   | 610  | p.E610K               | CNS                          | Glioma                | COSM4746332 | c.1828G>A    | 51                   |
| <i>TCF4</i>    | 573  | p.E573K               | Hematopoietic; CNS           | Hematopoietic; Glioma | COSM1736660 | c.1717G>A    | 52,53                |
| <i>TCF4</i>    | 573  | p.E573Q               | Pancreas                     | Carcinoma             | COSM5000304 | c.1717G>C    | 54                   |
| <i>TCF4</i>    | 573  | p.E573*               | Lung                         | Carcinoma             | COSM563718  | c.1717G>T    |                      |
| <i>TFAP4</i>   | 57   | p.E57K                | Skin                         | Melanoma              | COSM3509614 | c.169G>A     |                      |

\*<https://cancer.sanger.ac.uk/cosmic>.

bHLH, basic helix-loop-helix; CNS, central nervous system.

**Supplemental Table 3. T-NHL samples studied for *MSC*<sup>E116K</sup>**

| WHO Diagnosis      | Genetic Subtype |           |           |          |           | Total        |
|--------------------|-----------------|-----------|-----------|----------|-----------|--------------|
|                    | ALK             | DUSP22    | -/-       | TP63     | N/A*      |              |
| ALCL, ALK positive | 46              | 0         | 0         | 0        | -         | 46           |
| ALCL, ALK negative | 0               | 28        | 46        | 8        | 5         | 87           |
| ALCL, cutaneous    | 0               | 12        | 19        | 1        | -         | 32           |
| AITL               | -               | -         | -         | -        | 22        | 22           |
| PTCL, NOS          | -               | -         | -         | -        | 40        | 40           |
| Other              | -               | -         | -         | -        | 11        | 11           |
| <b>Total</b>       | <b>46</b>       | <b>40</b> | <b>65</b> | <b>9</b> | <b>78</b> | <b>238</b>   |
| Age, mean          |                 |           |           |          |           | 56 years     |
| Age, range         |                 |           |           |          |           | 6 – 96 years |
| M:F ratio          |                 |           |           |          |           | 1.7          |

\*N/A, not applicable. Includes subtypes other than ALCL and 5 cases of ALCL for which genetic subtype could not be determined.

AITL, angioimmunoblastic T-cell lymphoma; ALCL, anaplastic large cell lymphoma; PTCL, NOS, peripheral T-cell lymphoma, not otherwise specified; T-NHL, T-cell non-Hodgkin lymphoma; WHO, World Health Organization.



**Supplemental Table 4. T-NHL samples studied musculin expression by immunohistochemistry**

| WHO Diagnosis      | Genetic Subtype |        |     |      |      | Total        |
|--------------------|-----------------|--------|-----|------|------|--------------|
|                    | ALK             | DUSP22 | -/- | TP63 | N/A* |              |
| ALCL, ALK positive | 25              | 0      | 0   | 0    | -    | 25           |
| ALCL, ALK negative | 0               | 7      | 27  | 3    | 2    | 39           |
| ALCL, cutaneous    | 0               | 7      | 10  | 0    | 4    | 21           |
| AITL               | -               | -      | -   | -    | 22   | 22           |
| PTCL, NOS          | -               | -      | -   | -    | 32   | 32           |
| Other              | -               | -      | -   | -    | 8    | 8            |
| Total              | 25              | 14     | 37  | 3    | 68   | 147          |
| Age, mean          |                 |        |     |      |      | 58 years     |
| Age, range         |                 |        |     |      |      | 6 – 90 years |
| M:F ratio          |                 |        |     |      |      | 1.9          |

\*N/A, not applicable. Includes subtypes other than ALCL and 6 cases of ALCL for which genetic subtype could not be determined.

AITL, angioimmunoblastic T-cell lymphoma; ALCL, anaplastic large cell lymphoma; PTCL, NOS, peripheral T-cell lymphoma, not otherwise specified; T-NHL, T-cell non-Hodgkin lymphoma; WHO, World Health Organization.

**Supplemental Table 5. Proteins co-immunoprecipitated with wild-type and/or mutant musculin**

| Gene Symbol    | Distinct Peptides | Distinct Matches | Filtered Spectra | Description                                            | Normalized Arithmetic Average Counts* |    |   | Log <sub>2</sub> Ratio |        |        | P value |        |        |
|----------------|-------------------|------------------|------------------|--------------------------------------------------------|---------------------------------------|----|---|------------------------|--------|--------|---------|--------|--------|
|                |                   |                  |                  |                                                        | M                                     | W  | C | M vs C                 | W vs C | M vs W | M vs C  | W vs C | M vs W |
| <i>HK1</i>     | 24                | 26               | 57               | hexokinase 1                                           | 1                                     | 5  | 0 | 1.00                   | 2.58   | -1.58  | 0.161   | 0.001  | 0.039  |
| <i>GSTP1</i>   | 17                | 25               | 83               | glutathione S-transferase pi 1                         | 2                                     | 7  | 1 | 0.58                   | 2.00   | -1.42  | 0.395   | 0.014  | 0.073  |
| <i>RUNX1</i>   | 16                | 19               | 36               | runt related transcription factor 1                    | 0                                     | 5  | 0 | 0.00                   | 2.58   | -2.58  | 0.647   | 0.001  | 0.000  |
| <i>UBTF</i>    | 12                | 12               | 28               | upstream binding transcription factor                  | 0                                     | 2  | 5 | -2.58                  | -1.00  | -1.58  | 0.000   | 0.157  | 0.039  |
| <i>TCF4</i>    | 24                | 30               | 87               | transcription factor 4                                 | 5                                     | 9  | 0 | 2.58                   | 3.32   | -0.74  | 0.000   | 0.000  | 0.406  |
| <i>AP1B1</i>   | 28                | 30               | 49               | adaptor related protein complex 1 subunit beta 1       | 5                                     | 2  | 0 | 2.58                   | 1.58   | 1.00   | 0.000   | 0.060  | 0.113  |
| <i>UBP1</i>    | 11                | 13               | 30               | upstream binding protein 1                             | 0                                     | 5  | 0 | 0.00                   | 2.58   | -2.58  | 0.647   | 0.001  | 0.000  |
| <i>TCF3</i>    | 37                | 47               | 122              | transcription factor 3                                 | 2                                     | 15 | 0 | 1.58                   | 4.00   | -2.42  | 0.021   | 0.000  | 0.001  |
| <i>PDCD6IP</i> | 33                | 43               | 93               | programmed cell death 6 interacting protein            | 7                                     | 6  | 0 | 3.00                   | 2.81   | 0.19   | 0.000   | 0.000  | 0.564  |
| <i>BCAR1</i>   | 31                | 43               | 118              | BCAR1, Cas family scaffold protein                     | 2                                     | 27 | 8 | -1.58                  | 1.64   | -3.22  | 0.027   | 0.051  | 0.000  |
| <i>TCF4</i>    | 19                | 25               | 73               | transcription factor 4                                 | 4                                     | 7  | 0 | 2.32                   | 3.00   | -0.68  | 0.000   | 0.000  | 0.445  |
| <i>SH2D3C</i>  | 15                | 15               | 36               | SH2 domain containing 3C                               | 0                                     | 5  | 1 | -1.00                  | 1.58   | -2.58  | 0.186   | 0.060  | 0.000  |
| <i>JUNB</i>    | 12                | 16               | 52               | JunB proto-oncogene, AP-1 transcription factor subunit | 1                                     | 5  | 8 | -2.17                  | -0.58  | -1.58  | 0.002   | 0.346  | 0.039  |
| <i>SPTAN1</i>  | 59                | 63               | 115              | spectrin alpha, non-erythrocytic 1                     | 2                                     | 7  | 1 | 0.58                   | 2.00   | -1.42  | 0.395   | 0.014  | 0.073  |
| <i>TCF3</i>    | 40                | 51               | 143              | transcription factor 3                                 | 4                                     | 17 | 0 | 2.32                   | 4.17   | -1.85  | 0.000   | 0.000  | 0.013  |
| <i>TCF12</i>   | 48                | 67               | 229              | transcription factor 12                                | 15                                    | 23 | 0 | 4.00                   | 4.58   | -0.58  | 0.000   | 0.000  | 0.503  |
| <i>TPR</i>     | 48                | 52               | 94               | translocated promoter region, nuclear basket protein   | 0                                     | 6  | 3 | -2.00                  | 0.81   | -2.81  | 0.004   | 0.349  | 0.000  |
| <i>UBA1</i>    | 39                | 55               | 120              | ubiquitin like modifier activating enzyme 1            | 2                                     | 5  | 0 | 1.58                   | 2.58   | -1.00  | 0.021   | 0.001  | 0.243  |
| <i>FASN</i>    | 81                | 90               | 202              | fatty acid synthase                                    | 8                                     | 16 | 3 | 1.17                   | 2.09   | -0.92  | 0.098   | 0.010  | 0.291  |
| <i>GZMB</i>    | 22                | 48               | 212              | granzyme B                                             | 31                                    | 38 | 5 | 2.42                   | 2.70   | -0.29  | 0.000   | 0.001  | 0.638  |
| <i>CLTC</i>    | 61                | 75               | 164              | clathrin heavy chain                                   | 7                                     | 12 | 1 | 2.00                   | 2.70   | -0.70  | 0.003   | 0.001  | 0.430  |

|               |     |     |     |                                                       |    |    |    |       |       |       |       |       |       |
|---------------|-----|-----|-----|-------------------------------------------------------|----|----|----|-------|-------|-------|-------|-------|-------|
| <i>DOCK2</i>  | 54  | 63  | 135 | dedicator of cytokinesis 2                            | 1  | 12 | 5  | -1.58 | 1.12  | -2.70 | 0.027 | 0.202 | 0.000 |
| <i>MARS</i>   | 26  | 30  | 64  | methionyl-tRNA synthetase                             | 7  | 1  | 5  | 0.42  | -1.58 | 2.00  | 0.500 | 0.028 | 0.001 |
| <i>MSC</i>    | 16  | 32  | 116 | musculin                                              | 6  | 17 | 0  | 2.81  | 4.17  | -1.36 | 0.000 | 0.000 | 0.088 |
| <i>MVP</i>    | 42  | 51  | 118 | major vault protein                                   | 2  | 13 | 4  | -0.74 | 1.49  | -2.22 | 0.333 | 0.081 | 0.002 |
| <i>ACTR3</i>  | 26  | 44  | 134 | ARP3 actin related protein 3 homolog                  | 6  | 20 | 4  | 0.49  | 2.07  | -1.58 | 0.458 | 0.011 | 0.039 |
| <i>ACTR2</i>  | 20  | 30  | 67  | ARP2 actin related protein 2 homolog                  | 2  | 7  | 1  | 0.58  | 2.00  | -1.42 | 0.395 | 0.014 | 0.073 |
| <i>PLIN3</i>  | 25  | 43  | 121 | perilipin 3                                           | 8  | 2  | 1  | 2.17  | 0.58  | 1.58  | 0.001 | 0.458 | 0.012 |
| <i>MCM4</i>   | 38  | 51  | 102 | minichromosome maintenance complex component 4        | 3  | 8  | 1  | 1.00  | 2.17  | -1.17 | 0.161 | 0.007 | 0.157 |
| <i>SND1</i>   | 37  | 45  | 98  | staphylococcal nuclease and tudor domain containing 1 | 2  | 9  | 1  | 0.58  | 2.32  | -1.74 | 0.395 | 0.004 | 0.021 |
| <i>DHX30</i>  | 39  | 42  | 98  | DExH-box helicase 30                                  | 1  | 8  | 3  | -1.00 | 1.17  | -2.17 | 0.186 | 0.180 | 0.003 |
| <i>PRRC2C</i> | 39  | 40  | 88  | proline rich coiled-coil 2C                           | 5  | 1  | 9  | -0.74 | -2.32 | 1.58  | 0.333 | 0.001 | 0.012 |
| <i>EIF5B</i>  | 28  | 31  | 59  | eukaryotic translation initiation factor 5B           | 0  | 2  | 5  | -2.58 | -1.00 | -1.58 | 0.000 | 0.157 | 0.039 |
| <i>DDX47</i>  | 7   | 8   | 25  | DEAD-box helicase 47                                  | 0  | 2  | 5  | -2.58 | -1.00 | -1.58 | 0.000 | 0.157 | 0.039 |
| <i>DDX28</i>  | 17  | 17  | 41  | DEAD-box helicase 28                                  | 0  | 1  | 6  | -2.81 | -1.81 | -1.00 | 0.000 | 0.012 | 0.243 |
| <i>PLEC</i>   | 218 | 249 | 608 | plectin                                               | 17 | 8  | 39 | -1.15 | -2.15 | 1.00  | 0.122 | 0.003 | 0.113 |

C, control; M, mutant (E116K); W, wild-type.

\*Based on the results of 3 independent experiments.

**Supplemental Table 6. Top GSEA pathways altered in CD3/CD28-stimulated normal CD4<sup>+</sup> T cells: MSC<sup>wt</sup> vs. vector only**

| Gene Set                           | Size | ES       | NES      | Nominal <i>P</i> Value | FDR <i>Q</i> Value | FWER <i>P</i> Value |
|------------------------------------|------|----------|----------|------------------------|--------------------|---------------------|
| HALLMARK_MYC_TARGETS_V2            | 57   | -0.80122 | -2.92922 | 0                      | 0                  | 0                   |
| HALLMARK_MYC_TARGETS_V1            | 199  | -0.64298 | -2.9243  | 0                      | 0                  | 0                   |
| HALLMARK_MTORC1_SIGNALING          | 189  | -0.54864 | -2.47751 | 0                      | 0                  | 0                   |
| HALLMARK_E2F_TARGETS               | 197  | -0.50034 | -2.25411 | 0                      | 0                  | 0                   |
| HALLMARK_UNFOLDED_PROTEIN_RESPONSE | 100  | -0.51779 | -2.1134  | 0                      | 0                  | 0                   |
| HALLMARK_OXIDATIVE_PHOSPHORYLATION | 195  | -0.46664 | -2.11053 | 0                      | 0                  | 0                   |
| HALLMARK_ESTROGEN_RESPONSE_LATE    | 99   | -0.44014 | -1.81324 | 0                      | 0.001719           | 0.013               |
| HALLMARK_GLYCOLYSIS                | 130  | -0.42485 | -1.8019  | 0                      | 0.001815           | 0.016               |
| HALLMARK_G2M_CHECKPOINT            | 189  | -0.40258 | -1.80152 | 0                      | 0.001614           | 0.016               |

ES, enrichment score; FDR, false discovery rate; FWER, familywise error rate; GSEA, gene set enrichment analysis; NES, normalized enrichment score.

**Supplemental Table 7. Top GSEA pathways altered in CD3/CD28-stimulated normal CD4<sup>+</sup> T cells: MSC<sup>E116K</sup> vs. MSC<sup>wt</sup>**

| Gene Set                                 | Size | ES       | NES      | Nominal <i>P</i> Value | FDR <i>Q</i> Value | FWER <i>P</i> Value |
|------------------------------------------|------|----------|----------|------------------------|--------------------|---------------------|
| HALLMARK_MYC_TARGETS_V1                  | 199  | 0.651127 | 2.785856 | 0                      | 0                  | 0                   |
| HALLMARK_MYC_TARGETS_V2                  | 57   | 0.769985 | 2.732203 | 0                      | 0                  | 0                   |
| HALLMARK_MTORC1_SIGNALING                | 189  | 0.565114 | 2.396883 | 0                      | 0                  | 0                   |
| HALLMARK_E2F_TARGETS                     | 197  | 0.533282 | 2.285488 | 0                      | 0                  | 0                   |
| HALLMARK_IL2_STAT5_SIGNALING             | 143  | 0.54192  | 2.212824 | 0                      | 0                  | 0                   |
| HALLMARK_UNFOLDED_PROTEIN_RESPONSE       | 100  | 0.508958 | 1.984764 | 0                      | 5.16E-04           | 0.002               |
| HALLMARK_OXIDATIVE_PHOSPHORYLATION       | 195  | 0.462097 | 1.972647 | 0                      | 4.43E-04           | 0.002               |
| HALLMARK_G2M_CHECKPOINT                  | 189  | 0.451521 | 1.93144  | 0                      | 5.33E-04           | 0.003               |
| HALLMARK_ESTROGEN_RESPONSE_LATE          | 99   | 0.490707 | 1.908234 | 0                      | 8.87E-04           | 0.006               |
| HALLMARK_REACTIVE_OXIGEN_SPECIES_PATHWAY | 42   | 0.562034 | 1.834938 | 0.001736               | 0.001803           | 0.014               |
| HALLMARK_KRAS_SIGNALING_UP               | 77   | 0.475999 | 1.758647 | 0.001818               | 0.003282           | 0.028               |
| HALLMARK_XENOBIOTIC_METABOLISM           | 97   | 0.443442 | 1.74612  | 0                      | 0.003552           | 0.033               |
| HALLMARK_GLYCOLYSIS                      | 130  | 0.425628 | 1.722956 | 0                      | 0.004779           | 0.046               |

ES, enrichment score; FDR, false discovery rate; FWER, familywise error rate; GSEA, gene set enrichment analysis; NES, normalized enrichment score.

**Supplemental Table 8. T-NHL samples studied for MYC expression by immunohistochemistry**

| WHO Diagnosis      | <i>MSC</i> <sup>E116K</sup> |    | Total        |
|--------------------|-----------------------------|----|--------------|
|                    | Yes                         | No |              |
| ALCL, ALK positive | 0                           | 17 | 17           |
| ALCL, ALK negative | 7                           | 23 | 30           |
| ALCL, cutaneous    | 1                           | 13 | 14           |
| AITL               | 0                           | 8  | 8            |
| PTCL, NOS          | 0                           | 11 | 11           |
| ENKTL              | 0                           | 2  | 2            |
| MF                 | 0                           | 1  | 1            |
| Total              | 8                           | 75 | 83           |
| Age, mean          |                             |    | 54 years     |
| Age, range         |                             |    | 6 – 87 years |
| M:F ratio          |                             |    | 1.8          |

AITL, angioimmunoblastic T-cell lymphoma; ALCL, anaplastic large cell lymphoma; ENKTL, extranodal NK/T-cell lymphoma, nasal type; FFPE, formalin-fixed, paraffin-embedded; MF, mycosis fungoides; PTCL, NOS, peripheral T-cell lymphoma, not otherwise specified; T-NHL, T-cell non-Hodgkin lymphoma; WHO, World Health Organization.

## SUPPLEMENTAL FIGURES

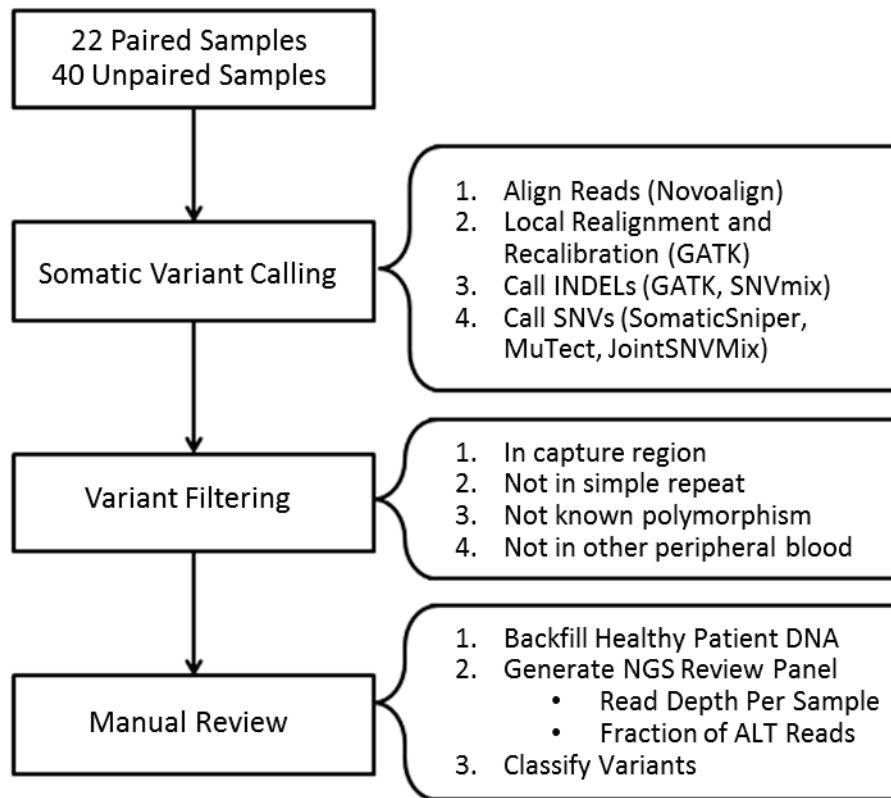

**Supplemental Figure 1. Workflow used for variant calling and prioritization.**

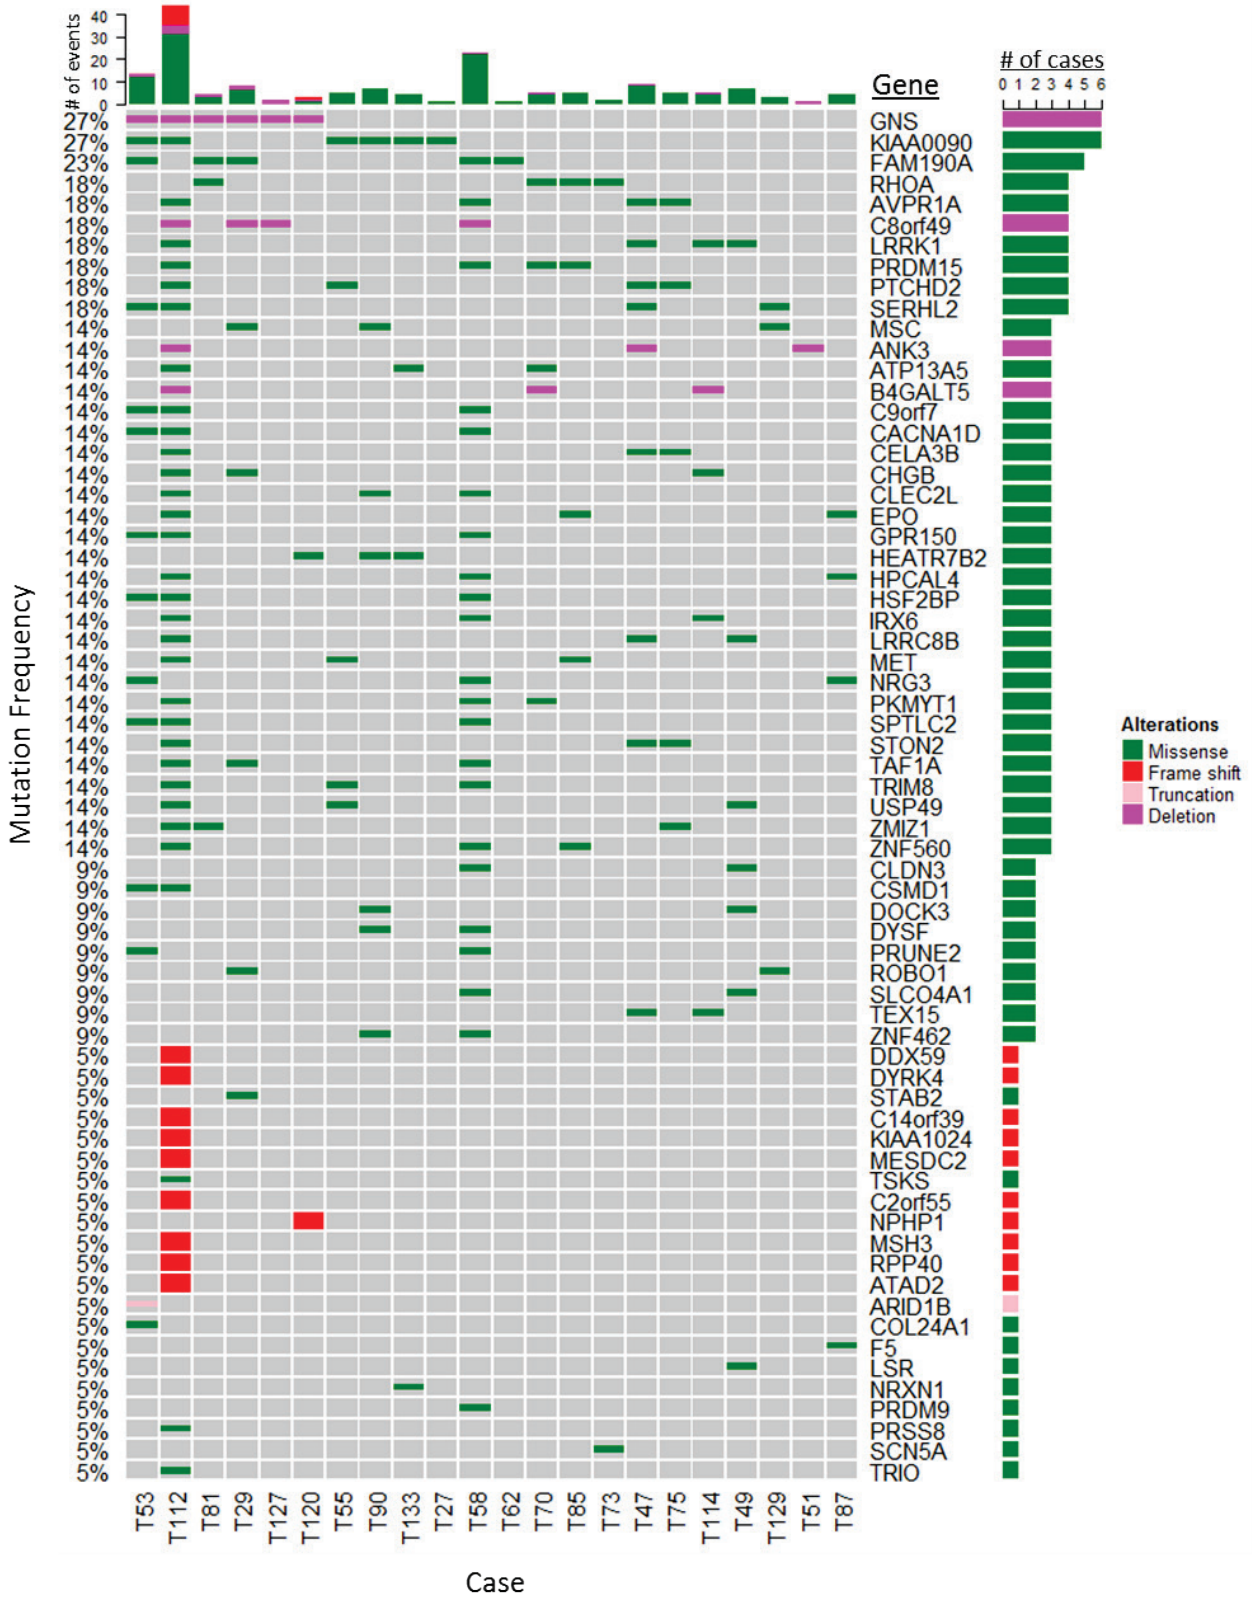

**Supplemental Figure 2. Gene-level analysis of somatic variants in paired exome data.** Somatic variants were called in 22 paired tumor-normal samples. Clinicopathologic features are



shown in Supplemental Table 1. In addition to the *RHOA* and *MSC* mutations discussed in the main text, other genes previously reported to be mutated in T-cell lymphomas are noted, such as the chromatin-modifying gene *ARID1B*.<sup>55</sup> Interestingly, the case with the highest mutation burden, T112, an enteropathy-associated T-cell lymphoma, had a frameshift mutation of *MSH3*, c.1148delA, an event also identified in an additional unpaired sample (Table 1). *MSH3* (MutS Homolog 3) encodes a component of the post-replicative DNA mismatch repair machinery. c.1148delA is a known somatic cancer mutation resulting in a premature stop codon and microsatellite instability,<sup>56</sup> but previously unreported in lymphoma. Of note, mutations leading to mismatch repair deficiency are associated with an increased somatic mutation burden and may predict response to immunotherapeutic approaches such as immune checkpoint blockade.<sup>57</sup>

**A**

|          |     |                                                                |     |
|----------|-----|----------------------------------------------------------------|-----|
| MSC      | 109 | RNAANAR <b>ERAR</b> MRVLSKAFSRLKTSLPWVPPDTKLSKLDLRLASSYIAHL    | 159 |
| HAND1    | 96  | KGSGPKK <b>ERRR</b> TESINSAFAELRECIPNVPADTKLSKIKT LRLATS YIAYL | 146 |
| MYOD1    | 111 | RKAATMR <b>ERRR</b> L SKVNEAFETLKRCT-SSNPNQRLPKVEILRNAIRYIEGL  | 160 |
| TCF3/E47 | 548 | RMANNAR <b>ERVVR</b> DINEAFREL                                 | 569 |
| TCF12    | 603 | RMANNAR <b>ERLR</b> VRDINEAFKEL                                | 624 |
| TCF4     | 570 | RMANNAR <b>ERLR</b> VRDINEAFKEL                                | 591 |

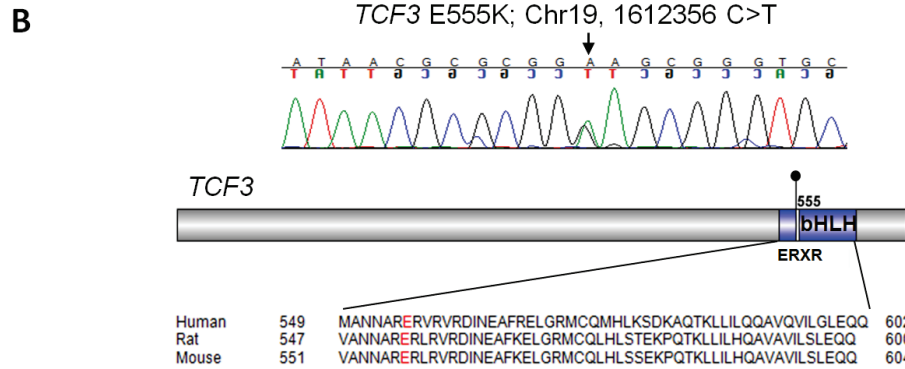

**Supplemental Figure 3. Conservation of the ERXR motif in the basic domain of bHLH proteins.** (A) Amino acid sequences around the ERXR motif of several bHLH proteins are shown with positions of the first and last residues. Conserved glutamic acid (E) and arginine (R) residues are shown in red. (B) *TCF3*<sup>E555K</sup> mutation affecting the glutamic acid residue of the ERXR motif of the bHLH protein TCF3 (E2A) identified in a case of ALK-negative ALCL. Sanger validation is shown.

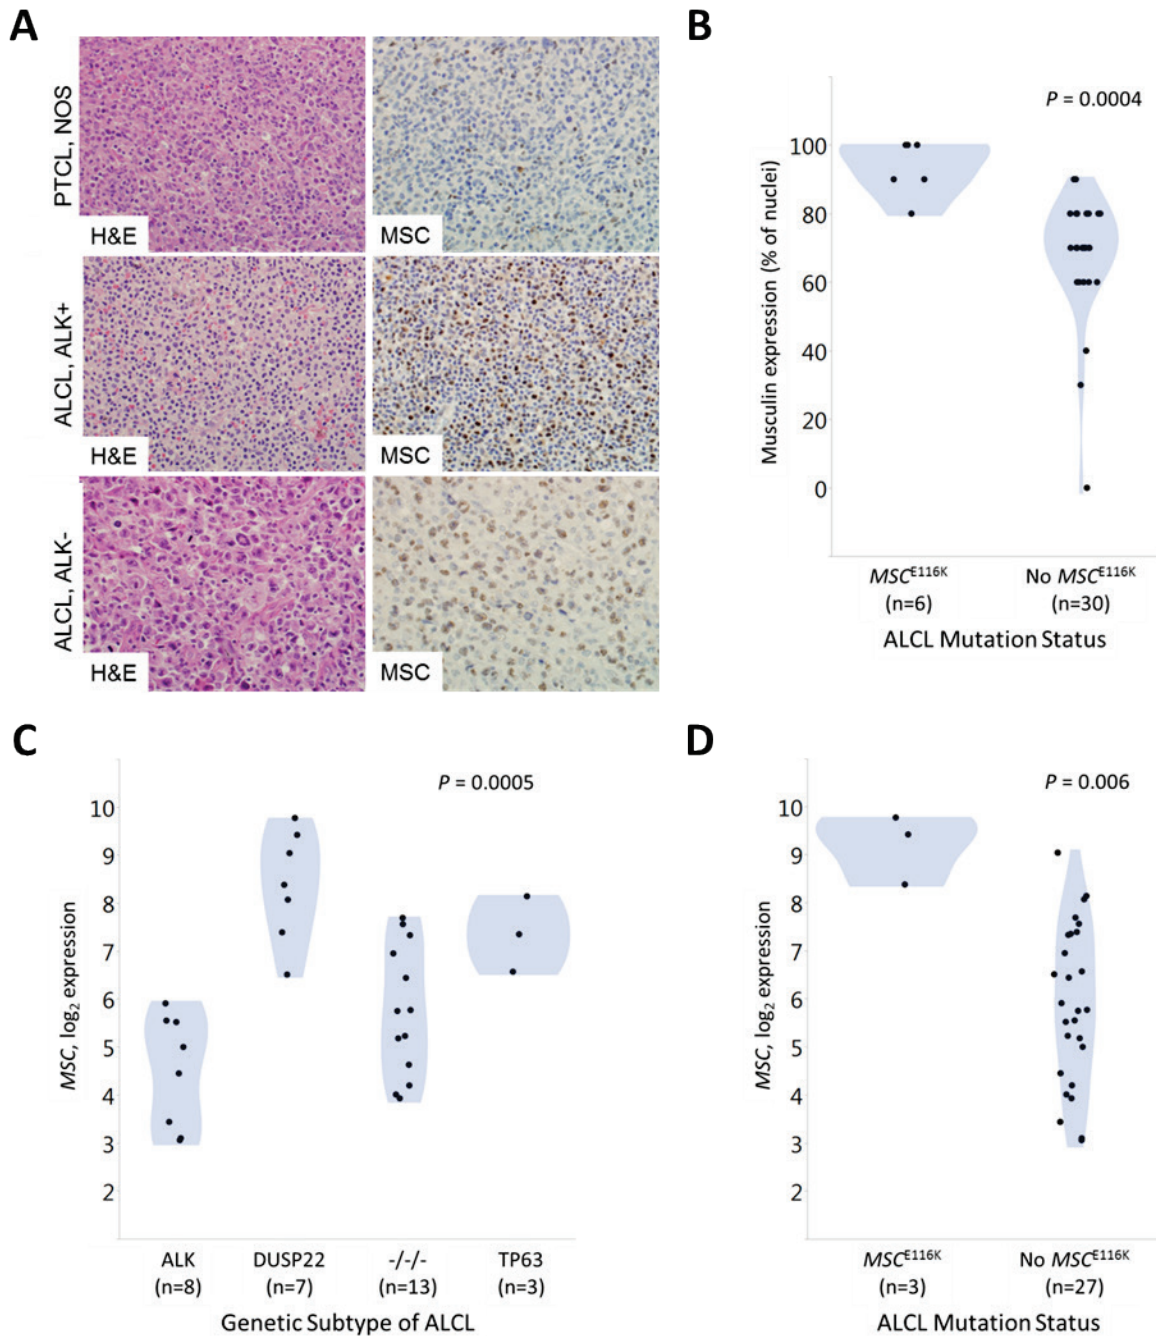

**Supplemental Figure 4. Expression of musclin protein and the *MSC* gene in ALCL.** (A) Immunohistochemical staining for musclin in T-NHLs without *MSC*<sup>E116K</sup>. All images: original magnification, ×400. (B) ALCLs with *MSC*<sup>E116K</sup> consistently express musclin. (C) Gene expression data (N=31)<sup>16,28</sup> also show high levels of *MSC* expression in ALK-negative ALCLs with *DUSP22* rearrangement. (D) ALCLs with *MSC*<sup>E116K</sup> consistently express high levels of *MSC*. N=30; *MSC* mutation status was unavailable in 1 case.

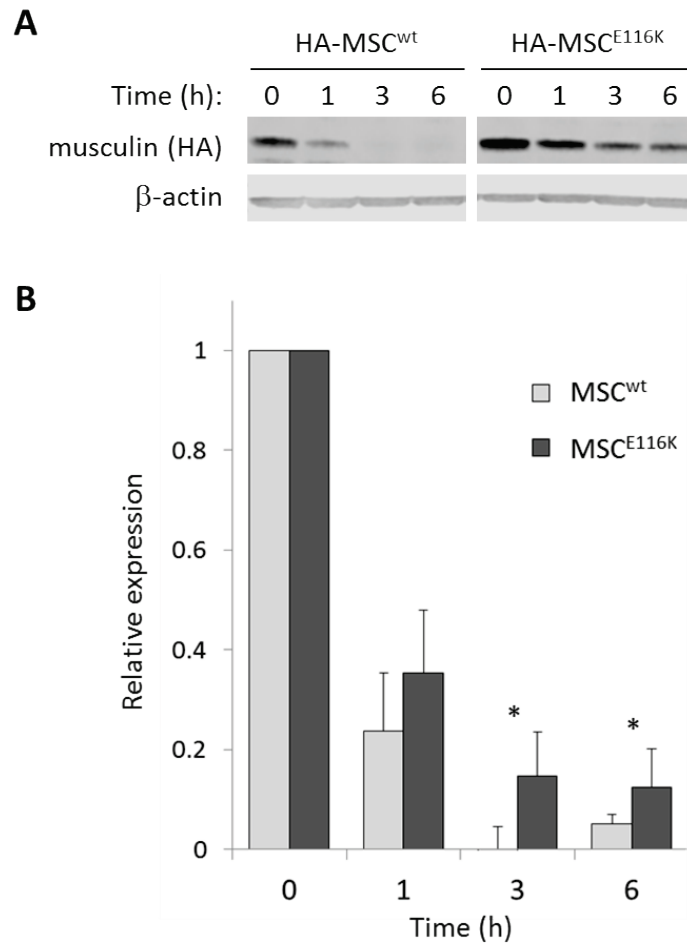

**Supplemental Figure 5. Protein stability of MSC<sup>wt</sup> and MSC<sup>E116K</sup>.** (A) Representative Western blot of lysates from Karpas 299 cells overexpressing HA-tagged MSC<sup>wt</sup> and MSC<sup>E116K</sup> at the timepoints indicated after treatment with cycloheximide and the caspase inhibitor Q-VD-OPh. (B) Background-corrected densitometry values normalized to β-actin and expressed relative to time 0. Data reflect 3 independent experiments. \*,  $P < 0.05$ .

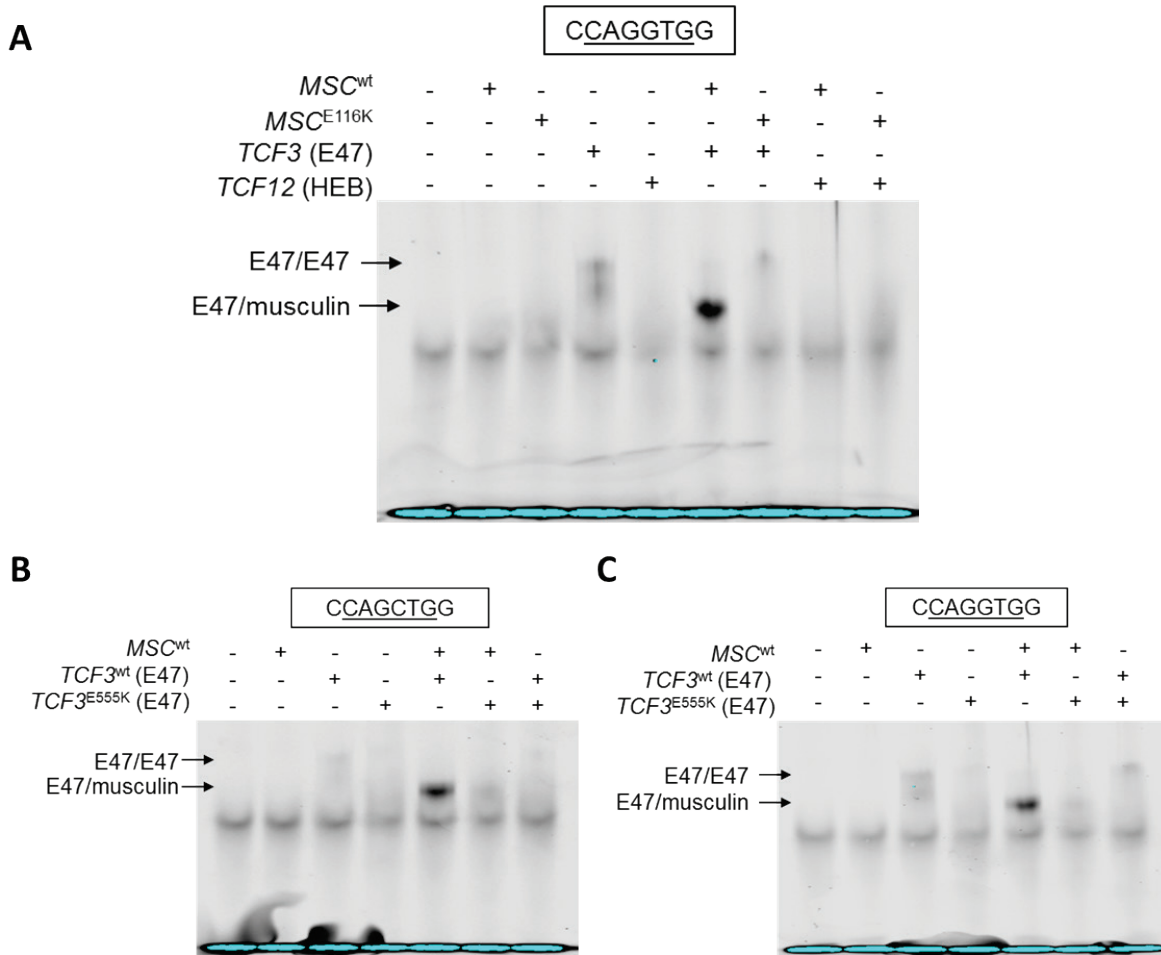

**Supplemental Figure 6. DNA binding of wild-type and mutant bHLH proteins.** (A) EMSA of proteins generated by *in vitro* translation showed binding of E47/musculin heterodimers to the E2A-binding E-box motif CAGGTG in the presence of MSC<sup>wt</sup> but not MSC<sup>E116K</sup>. E47 homodimer binding to CAGGTG was abolished in the presence of either MSC<sup>wt</sup> or MSC<sup>E116K</sup>. (B) TCF3<sup>E555K</sup> diminished E47/musculin heterodimer binding to the musculin-binding motif CAGCTG. (C) TCF3<sup>E555K</sup> diminished E47/musculin heterodimer binding to the E2A-binding motif CAGGTG.

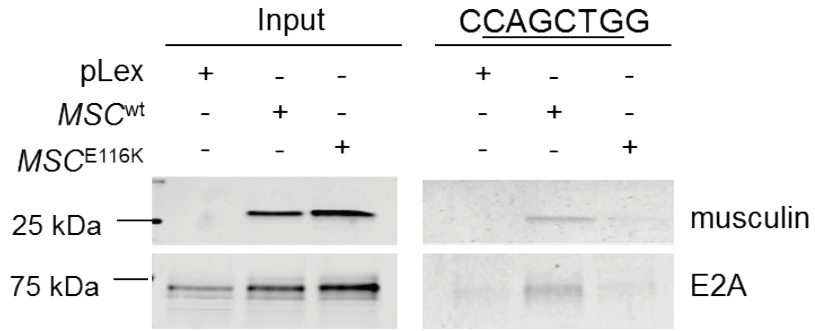

**Supplemental Figure 7. DNA affinity assay in Karpas 299 cells.** An oligonucleotide probe containing the musculin-binding motif CAGCTG pulled down both musculin and E2A in Karpas 299 cells transduced with *MSC*<sup>wt</sup> but not *MSC*<sup>E116K</sup>.

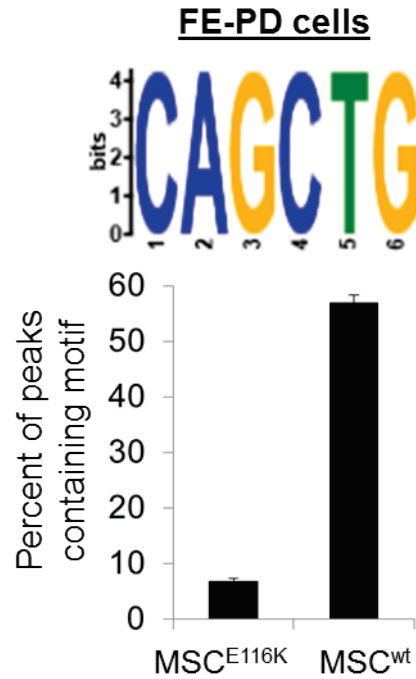

**Supplemental Figure 8. ChIP-seq for HA-tagged MSC<sup>wt</sup> and MSC<sup>E116K</sup> in ALK-negative ALCL cells.** ChIP-seq for HA-tagged MSC<sup>wt</sup> and MSC<sup>E116K</sup> in lentivirally transduced FE-PD cells demonstrated enrichment of the CAGCTG E-box motif for MSC<sup>wt</sup> (E-value = 5.50E-109) but not for MSC<sup>E116K</sup>. Data represent results of two independent experiments and are shown as means  $\pm$  S.D.

| Motif                                                                              | E-value   | Distribution           | TF prediction |
|------------------------------------------------------------------------------------|-----------|------------------------|---------------|
| <b>Karpas 299 MSC<sup>wt</sup></b>                                                 |           |                        |               |
|   | 1.40E-176 | Centered               | musculin      |
|   | 3.80E-12  | Not centrally enriched | AP-1          |
|   | 1.10E-05  | Not centrally enriched | BCL-6         |
| <b>Karpas 299 MSC<sup>E116K</sup></b>                                              |           |                        |               |
|   | 7.00E-34  | Not centrally enriched | AP-1          |
|   | 2.80E-15  | Centered               | TCF3/4        |
|  | 2.20E-13  | Centered               | TCF3/4        |

**Supplemental Figure 9. ChIP-seq motif analysis for HA-tagged MSC<sup>wt</sup> and MSC<sup>E116K</sup> in Karpas 299 cells.**



A

**Normal T cells:  $MSC^{E116K}$  vs.  $MSC^{wt}$** 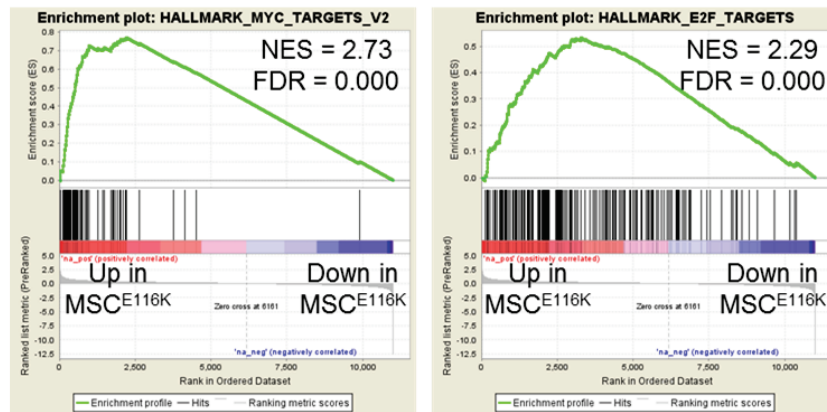

B

**Normal T cells:  $MSC^{E116K}$  vs. Vector-only**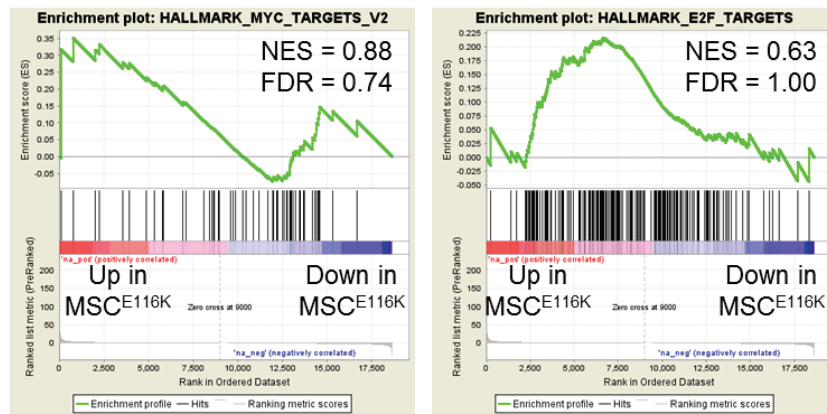

**Supplemental Figure 10. Gene Set Enrichment Analysis of  $MSC^{E116K}$ -transduced T cells.** (A) Gene Set Enrichment Analysis (GSEA) of genes differentially expressed in  $CD4^+$  T cells overexpressing  $MSC^{E116K}$  versus cells overexpressing  $MSC^{wt}$  showed enrichment of genes encoding MYC and E2F targets (the same pathways depleted in  $MSC^{wt}$ - versus control-transduced cells; main text, Figure 3E). (B) GSEA of genes differentially expressed in  $MSC^{E116K}$ - versus control-transduced cells showed neither enrichment nor depletion of these pathways.

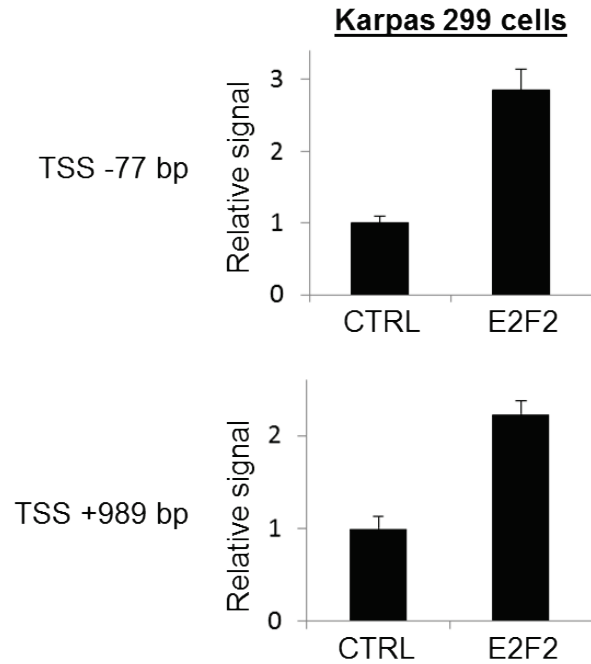

**Supplemental Figure 11. Binding of E2F2 to *TNFRSF8* (CD30) DNA in human ALCL cells.** Chromatin immunoprecipitation was performed to determine binding of HA-tagged E2F2 to *TNFRSF8* in Karpas 299 cells. Data reflect quantitative PCR results for 2 sites 77 bp upstream and 989 bp downstream of the *TNFRSF8* transcription start site (TSS), respectively.

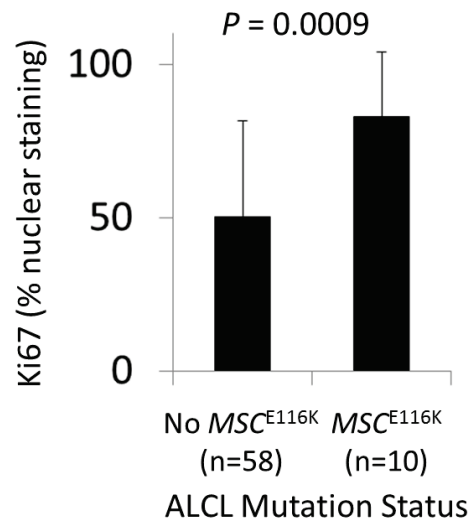

**Supplemental Figure 12. Proliferative rate in ALCLs with or without *MSC<sup>E116K</sup>*.** Data reflect the percentage of tumor cells with nuclear staining detected by immunohistochemistry for Ki67 in ALCL tissue samples. Data are shown as means  $\pm$  S.D.

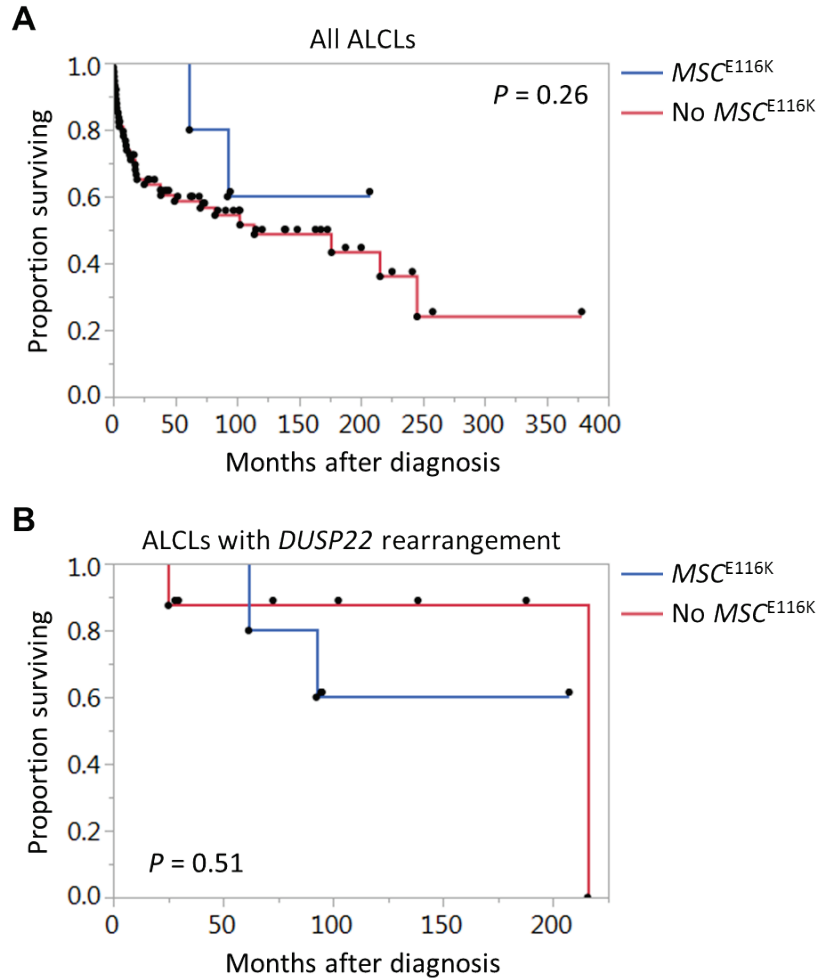

**Supplemental Figure 13. Outcome analysis of ALCLs with and without  $MSC^{E116K}$ .** (A) Among all patients with ALCL and available outcome data, no significant difference in overall survival was observed between those with  $MSC^{E116K}$  (n=9) and those without  $MSC^{E116K}$  (n=77;  $P=0.26$ , log-rank test). (B) Among patients with ALCL with *DUSP22* rearrangement and available outcome data, no significant difference in overall survival was observed between those with  $MSC^{E116K}$  (n=9) and those without  $MSC^{E116K}$  (n=10;  $P=0.51$ ).

**SUPPLEMENTAL REFERENCES**

1. Feldman AL, Dogan A, Smith DI, et al. Discovery of recurrent t(6;7)(p25.3;q32.3) translocations in ALK-negative anaplastic large cell lymphomas by massively parallel genomic sequencing. *Blood*. 2011;117(3):915-919.
2. Cerhan JR, Link BK, Habermann TM, et al. Cohort Profile: The Lymphoma Specialized Program of Research Excellence (SPORE) Molecular Epidemiology Resource (MER) Cohort Study. *Int J Epidemiol*. 2017;46(6):1753-1754i.
3. Olson JE, Ryu E, Johnson KJ, et al. The Mayo Clinic Biobank: a building block for individualized medicine. *Mayo Clin Proc*. 2013;88(9):952-962.
4. Hercus C. Novoalign; 2009.
5. McKenna A, Hanna M, Banks E, et al. The Genome Analysis Toolkit: a MapReduce framework for analyzing next-generation DNA sequencing data. *Genome Res*. 2010;20(9):1297-1303.
6. DePristo MA, Banks E, Poplin R, et al. A framework for variation discovery and genotyping using next-generation DNA sequencing data. *Nat Genet*. 2011;43(5):491-498.
7. Van der Auwera GA, Carneiro MO, Hartl C, et al. From FastQ data to high confidence variant calls: the Genome Analysis Toolkit best practices pipeline. *Curr Protoc Bioinformatics*. 2013;43:11 10 11-33.
8. Goya R, Sun MG, Morin RD, et al. SNVMix: predicting single nucleotide variants from next-generation sequencing of tumors. *Bioinformatics*. 2010;26(6):730-736.
9. Roth A, Ding J, Morin R, et al. JointSNVMix: a probabilistic model for accurate detection of somatic mutations in normal/tumour paired next-generation sequencing data. *Bioinformatics*. 2012;28(7):907-913.

10. Larson DE, Harris CC, Chen K, et al. SomaticSniper: identification of somatic point mutations in whole genome sequencing data. *Bioinformatics*. 2012;28(3):311-317.
11. Cibulskis K, Lawrence MS, Carter SL, et al. Sensitive detection of somatic point mutations in impure and heterogeneous cancer samples. *Nat Biotechnol*. 2013;31(3):213-219.
12. Exome Aggregation Consortium (ExAC). Cambridge, MA (URL: <http://exac.broadinstitute.org>). Jan 2015.
13. Tarailo-Graovac M, Chen N. Using RepeatMasker to identify repetitive elements in genomic sequences. *Curr Protoc Bioinformatics*. 2009;Chapter 4:Unit 4 10.
14. Wang C, Evans JM, Bhagwate AV, et al. PatternCNV: a versatile tool for detecting copy number changes from exome sequencing data. *Bioinformatics*. 2014;30(18):2678-2680.
15. Feldman AL, Law ME, Inwards DJ, Dogan A, McClure RF, Macon WR. PAX5-positive T-cell anaplastic large cell lymphomas associated with extra copies of the PAX5 gene locus. *Mod Pathol*. 2010;23(4):593-602.
16. Luchtel RA, Dasari S, Oishi N, et al. Molecular profiling reveals immunogenic cues in anaplastic large cell lymphomas with DUSP22 rearrangements. *Blood*. 2018;132(13):1386-1398.
17. Parrilla Castellar ER, Jaffe ES, Said JW, et al. ALK-negative anaplastic large cell lymphoma is a genetically heterogeneous disease with widely disparate clinical outcomes. *Blood*. 2014;124(9):1473-1480.
18. Davis TH, Morton CC, Miller-Cassman R, Balk SP, Kadin ME. Hodgkin's disease, lymphomatoid papulosis, and cutaneous T-cell lymphoma derived from a common T-cell clone. *N Engl J Med*. 1992;326(17):1115-1122.

19. Boddicker RL, Kip NS, Xing X, et al. The oncogenic transcription factor IRF4 is regulated by a novel CD30/NF-kappaB positive feedback loop in peripheral T-cell lymphoma. *Blood*. 2015;125(20):3118-3127.
20. Boddicker RL, Razidlo GL, Dasari S, et al. Integrated mate-pair and RNA sequencing identifies novel, targetable gene fusions in peripheral T-cell lymphoma. *Blood*. 2016;128(9):1234-1245.
21. Wang X, Dasari S, Nowakowski GS, et al. Retinoic acid receptor alpha drives cell cycle progression and is associated with increased sensitivity to retinoids in T-cell lymphoma. *Oncotarget*. 2017;8(16):26245-26255.
22. Kalari KR, Nair AA, Bhavsar JD, et al. MAP-RSeq: Mayo Analysis Pipeline for RNA sequencing. *BMC Bioinformatics*. 2014;15:224.
23. Kim D, Pertea G, Trapnell C, Pimentel H, Kelley R, Salzberg SL. TopHat2: accurate alignment of transcriptomes in the presence of insertions, deletions and gene fusions. *Genome Biol*. 2013;14(4):R36.
24. Anders S, Pyl PT, Huber W. HTSeq--a Python framework to work with high-throughput sequencing data. *Bioinformatics*. 2015;31(2):166-169.
25. Robinson MD, McCarthy DJ, Smyth GK. edgeR: a Bioconductor package for differential expression analysis of digital gene expression data. *Bioinformatics*. 2010;26(1):139-140.
26. Subramanian A, Tamayo P, Mootha VK, et al. Gene set enrichment analysis: a knowledge-based approach for interpreting genome-wide expression profiles. *Proc Natl Acad Sci U S A*. 2005;102(43):15545-15550.

27. Mootha VK, Lindgren CM, Eriksson KF, et al. PGC-1alpha-responsive genes involved in oxidative phosphorylation are coordinately downregulated in human diabetes. *Nat Genet.* 2003;34(3):267-273.
28. Hu G, Dasari S, Asmann YW, et al. Targetable fusions of the FRK tyrosine kinase in ALK-negative anaplastic large cell lymphoma. *Leukemia.* 2018;32(2):565-569.
29. Zhong J, Ye Z, Lenz SW, et al. Purification of nanogram-range immunoprecipitated DNA in ChIP-seq application. *BMC Genomics.* 2017;18(1):985.
30. Yan H, Evans J, Kalmbach M, et al. HiChIP: a high-throughput pipeline for integrative analysis of ChIP-Seq data. *BMC Bioinformatics.* 2014;15:280.
31. Li H, Durbin R. Fast and accurate short read alignment with Burrows-Wheeler transform. *Bioinformatics.* 2009;25(14):1754-1760.
32. Zhang Y, Liu T, Meyer CA, et al. Model-based analysis of ChIP-Seq (MACS). *Genome Biol.* 2008;9(9):R137.
33. Quinlan AR, Hall IM. BEDTools: a flexible suite of utilities for comparing genomic features. *Bioinformatics.* 2010;26(6):841-842.
34. Shen L, Shao N, Liu X, Nestler E. ngs.plot: Quick mining and visualization of next-generation sequencing data by integrating genomic databases. *BMC Genomics.* 2014;15:284.
35. Bailey TL, Boden M, Buske FA, et al. MEME SUITE: tools for motif discovery and searching. *Nucleic Acids Res.* 2009;37(Web Server issue):W202-208.
36. Grant CE, Bailey TL, Noble WS. FIMO: scanning for occurrences of a given motif. *Bioinformatics.* 2011;27(7):1017-1018.
37. Kessner D, Chambers M, Burke R, Agus D, Mallick P. ProteoWizard: open source software for rapid proteomics tools development. *Bioinformatics.* 2008;24(21):2534-2536.



38. Tabb DL, Fernando CG, Chambers MC. MyriMatch: highly accurate tandem mass spectral peptide identification by multivariate hypergeometric analysis. *J Proteome Res.* 2007;6(2):654-661.
39. Ma ZQ, Dasari S, Chambers MC, et al. IDPicker 2.0: Improved protein assembly with high discrimination peptide identification filtering. *J Proteome Res.* 2009;8(8):3872-3881.
40. Sadygov RG, Liu H, Yates JR. Statistical models for protein validation using tandem mass spectral data and protein amino acid sequence databases. *Anal Chem.* 2004;76(6):1664-1671.
41. Jen Y, Weintraub H, Benezra R. Overexpression of Id protein inhibits the muscle differentiation program: in vivo association of Id with E2A proteins. *Genes Dev.* 1992;6(8):1466-1479.
42. Gagoski D, Polinkovsky ME, Mureev S, et al. Performance benchmarking of four cell-free protein expression systems. *Biotechnol Bioeng.* 2016;113(2):292-300.
43. Wendt H, Thomas RM, Ellenberger T. DNA-mediated folding and assembly of MyoD-E47 heterodimers. *J Biol Chem.* 1998;273(10):5735-5743.
44. Macquarrie KL, Yao Z, Fong AP, Tapscott SJ. Genome-wide binding of the basic helix-loop-helix myogenic inhibitor musculin has substantial overlap with MyoD: implications for buffering activity. *Skelet Muscle.* 2013;3(1):26.
45. Sato Y, Yoshizato T, Shiraishi Y, et al. Integrated molecular analysis of clear-cell renal cell carcinoma. *Nat Genet.* 2013;45(8):860-867.
46. Giannakis M, Hodis E, Jasmine Mu X, et al. RNF43 is frequently mutated in colorectal and endometrial cancers. *Nat Genet.* 2014;46(12):1264-1266.

47. Pickering CR, Zhou JH, Lee JJ, et al. Mutational landscape of aggressive cutaneous squamous cell carcinoma. *Clin Cancer Res.* 2014;20(24):6582-6592.
48. Imielinski M, Berger AH, Hammerman PS, et al. Mapping the hallmarks of lung adenocarcinoma with massively parallel sequencing. *Cell.* 2012;150(6):1107-1120.
49. Cancer Genome Atlas N. Comprehensive molecular characterization of human colon and rectal cancer. *Nature.* 2012;487(7407):330-337.
50. Agrawal N, Jiao Y, Bettegowda C, et al. Comparative genomic analysis of esophageal adenocarcinoma and squamous cell carcinoma. *Cancer Discov.* 2012;2(10):899-905.
51. Taylor KR, Mackay A, Truffaux N, et al. Recurrent activating ACVR1 mutations in diffuse intrinsic pontine glioma. *Nat Genet.* 2014;46(5):457-461.
52. Nangalia J, Massie CE, Baxter EJ, et al. Somatic CALR mutations in myeloproliferative neoplasms with nonmutated JAK2. *N Engl J Med.* 2013;369(25):2391-2405.
53. Killela PJ, Pirozzi CJ, Reitman ZJ, et al. The genetic landscape of anaplastic astrocytoma. *Oncotarget.* 2014;5(6):1452-1457.
54. Witkiewicz AK, McMillan EA, Balaji U, et al. Whole-exome sequencing of pancreatic cancer defines genetic diversity and therapeutic targets. *Nat Commun.* 2015;6:6744.
55. McKinney M, Moffitt AB, Gaulard P, et al. The Genetic Basis of Hepatosplenic T-cell Lymphoma. *Cancer Discov.* 2017;7(4):369-379.
56. Risinger JI, Umar A, Boyd J, Berchuck A, Kunkel TA, Barrett JC. Mutation of MSH3 in endometrial cancer and evidence for its functional role in heteroduplex repair. *Nat Genet.* 1996;14(1):102-105.
57. Le DT, Durham JN, Smith KN, et al. Mismatch repair deficiency predicts response of solid tumors to PD-1 blockade. *Science.* 2017;357(6349):409-413.
